# Supplementary material for: Determination of N-nitrososarcosine in tobacco and smokeless tobacco products using isotope dilution liquid chromatography tandem mass spectrometry
Source: Royal Society of Chemistry journal article supplement (doi:10.1039/c2ay25540e), 2012-01-01

# Determination of *N*-nitrososarcosine in tobacco and smokeless tobacco products using isotope dilution liquid chromatography tandem mass spectrometry

Jingcun Wu, \* William S. Rickert, Andrew Masters and Peter Joza

*Labstat International ULC, 262 Manitou Drive, Kitchener, ON, Canada N2C 1L3*

## Electronic Supplementary Information

Figure S1. Calibration Curves generated on different days.

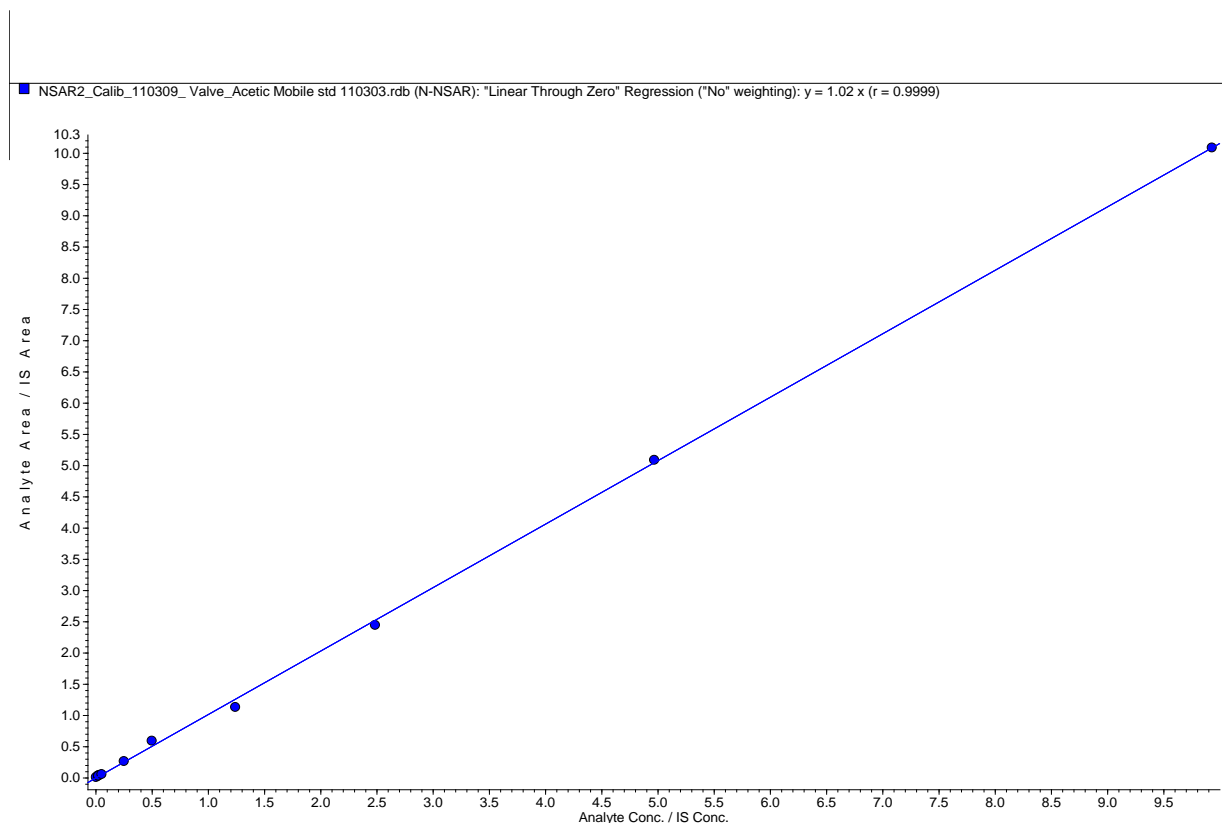

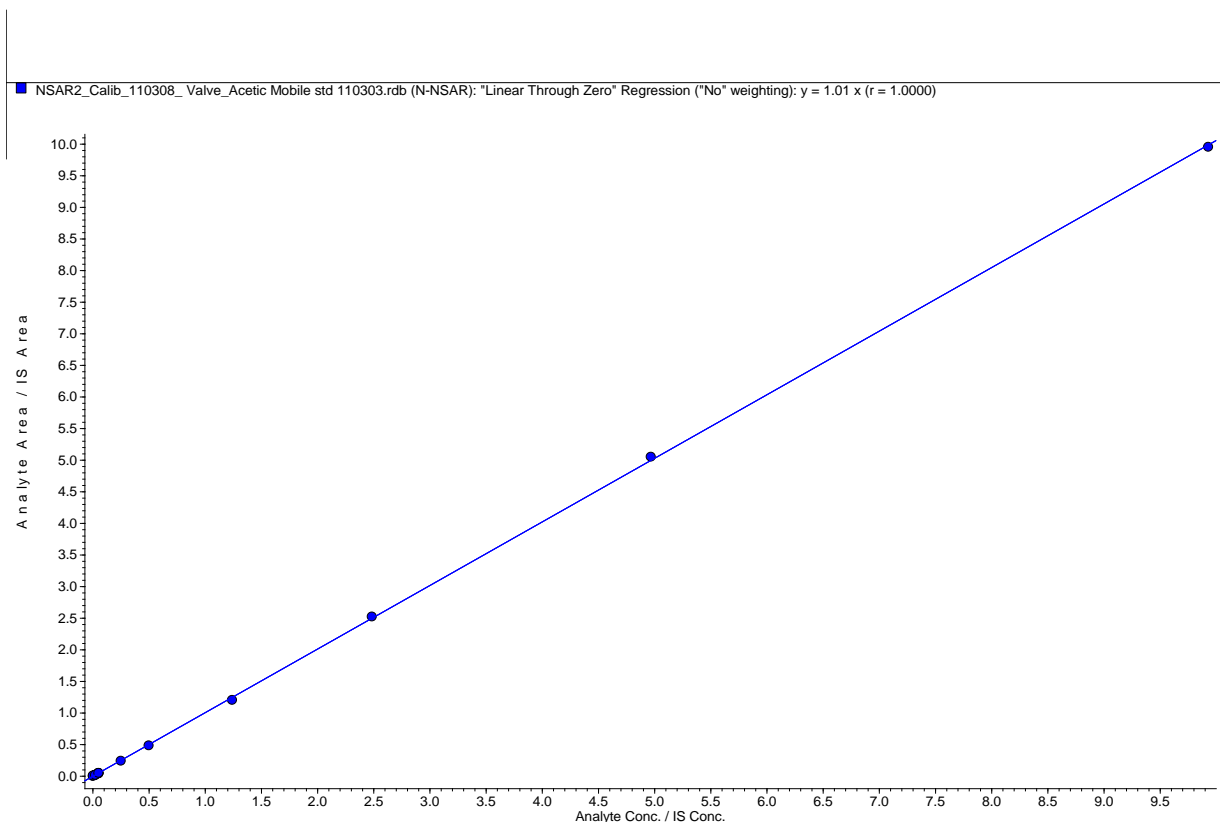

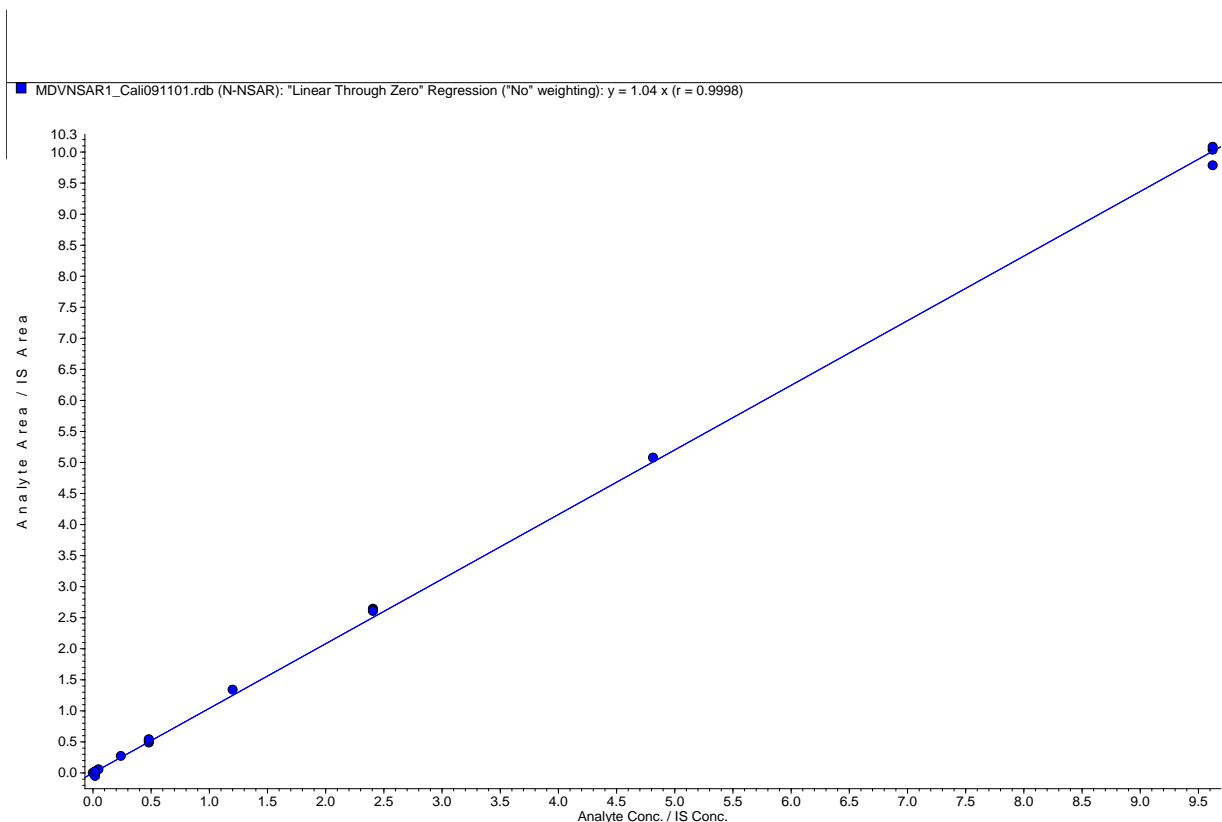

Supplement: c2ay25540e.pdf [file c2ay25540e.pdf]
